1  
2  
3  
4  
5  
6  
7  
8  
9  
10  
11  
12  
13  
14  
15  
16  
17  
18  
19  
20  
21  
22  
23  
24  
25  
26  
27  
28  
29  
30

## **A pseudomolecule assembly of the Rocky Mountain elk genome reveals putative immune system gene loss near chromosomal fissions**

Rick E Masonbrink <sup>1\*</sup>, David Alt,<sup>2</sup> Darrel O. Bayles,<sup>2</sup> Paola Boggiatto,<sup>2</sup> William Edwards <sup>3</sup>, Fred Tatum,<sup>4</sup> Jeffrey Williams,<sup>2</sup> Jenny Wilson-Welder,<sup>2</sup> Aleksey Zimin<sup>5</sup>, Andrew Severin <sup>1</sup>, Steven Olsen<sup>2</sup>

<sup>1</sup> Genome Informatics Facility, Department of Biotech, Iowa State University, Ames, IA, United States of America

<sup>2</sup> Infectious Bacterial Diseases Research Unit, National Animal Disease Center, Agricultural Research Service, U.S. Department of Agriculture, Ames, IA, United States of America

<sup>3</sup> Wildlife Health Laboratory, Wyoming Game and Fish Department, 1174 Snowy Range Road, Laramie WY, United States of America

<sup>4</sup> Respiratory Diseases Research Unit, National Animal Disease Center, Agricultural Research Service, U.S. Department of Agriculture, Ames, IA, United States of America

<sup>5</sup> Department of Biomedical Engineering, Johns Hopkins University, Baltimore, MD, United States of America

\* Corresponding author

Email: [remkv6@iastate.edu](mailto:remkv6@iastate.edu)

## 31 **Abstract**

32 Rocky Mountain elk (*Cervus canadensis*) is a major reservoir for *Brucella abortus* in the Greater Yellowstone area,  
33 which has significant economic implications to the cattle industry. Vaccination attempts against intracellular  
34 bacterial diseases in elk populations have not been successful due to a negligible adaptive cellular immune  
35 response. A lack of genomic resources has impeded attempts to better understand why vaccination does not  
36 induce protective immunity. To overcome this limitation, PacBio, Illumina, and HiC sequencing with a total of 686-  
37 fold coverage was used to assemble the elk genome into 35 pseudomolecules. A robust gene annotation was  
38 generated resulting in 18,013 gene models and 33,422 mRNAs. The accuracy of the assembly was assessed using  
39 synteny to the red deer and cattle genomes identifying several chromosomal rearrangements, fusions and fissions.  
40 Because this genome assembly and annotation provide a foundation for genome-enabled exploration of *Cervus*  
41 species, we demonstrate its utility by exploring the conservation of immune system-related genes. We conclude by  
42 comparing cattle immune system-related genes to the elk genome, revealing nine putative gene losses in elk.

## 43 **Author Summary**

44 Brucellosis, also known as contagious abortion, is a bacterial disease that commonly affects livestock and remains  
45 prevalent in Rocky Mountain elk (*Cervus canadensis*). Since the 1920's the USDA has led a program to eradicate  
46 Brucellosis from cattle, yet wild Rocky Mountain elk continue to be a source of transmission. Attempts to vaccinate  
47 wild elk herds have been unsuccessful, due to a poor and short-lived immune response. To investigate the genetic  
48 basis for this inherent difference, we created the first genome and annotation for the Rocky Mountain elk. This  
49 genome assembly is of the highest quality and contains single linear sequences for all 35 chromosomes. In order to  
50 generate gene models, an array of RNA-Seq data and proteins from many different organ tissues and cells were  
51 used in gene prediction software. Specifically, we compare cattle immune system genes with the Rocky Mountain  
52 elk, revealing the putative loss of nine immune-system related genes in elk.

53

## 54 Introduction

55 Rocky Mountain elk (*Cervus canadensis*) were once distributed across much of North America but now inhabit  
56 remote areas. Rocky Mountain elk were nearly exterminated from the Rocky Mountains of Alberta and British  
57 Columbia in the early 1900s,(1) but were restocked between 1916-1920 with elk from the Greater Yellowstone  
58 Area (2-5). By 1940 elk populations expanded so greatly, that periodic culling was necessary (3, 6). While elk have  
59 been reintroduced to many areas, the densest populations are maintained in mountainous remote areas, like the  
60 Greater Yellowstone Area.

61 Elk typically avoid the presence of domesticated livestock, yet they will utilize the same grounds for grazing when  
62 livestock are absent (7). This can be problematic for ranchers occupying areas near elk populations like the Greater  
63 Yellowstone Area. Elk are known reservoirs for brucellosis, (*Brucella abortus*) a disease that is highly contagious  
64 and poses a risk to livestock and humans (8-10). Because of the potential for causing abortion in cattle, the USDA  
65 used vaccines and serologic testing to nearly eradicate *B. abortus* from domestic herds (11). Yet in the last 15  
66 years, over 20 cases of transmission to cattle have been traced to wild elk populations in the Greater Yellowstone  
67 Area. Attempts to establish long-term immunity through vaccination have proven unfruitful, as elk have negligible  
68 adaptive cellular immune responses to existing Brucella vaccines (12). Because the eradication of *B. abortus* from  
69 cattle herds can cost hundreds of thousands of dollars and current tools make it unfeasible to control infection in  
70 wild elk, there is a need to dissect the genetic nature of limited immune responses in elk. With advances in  
71 sequencing technology (PacBio, Illumina and HiC), we are now able to investigate difference in adaptive immune  
72 response at the genomic level by examining the presence and absence of immune system-related genes. Here, we  
73 report a chromosomal level reference genome assembly and annotation of the Rocky Mountain elk and perform a  
74 preliminary investigation of immune gene loss between elk and cattle. Our results suggest a mechanism for gene  
75 loss of immune related genes through major chromosomal rearrangement and fusion.

## 76 **Methods**

### 77 **Animal Selection**

78 A male Rocky Mountain elk from a long term captive herd in Minnesota was selected for sequencing. The research  
79 protocol was approved by the National Animal Disease Center Animal Care and Use committee and all animals  
80 under the protocol were maintained in accordance with animal care regulations.

### 81 **Sequencing**

82 For the initial contig assembly we generated a hybrid data set with Illumina PCR-free 150bp paired end reads and  
83 PacBio RSII reads produced with P6-C4 chemistry. Chicago and HiC libraries were prepared as described  
84 previously(13, 14). Both Chicago and HiC libraries were prepared similarly, though HiC libraries were nuclear-fixed.  
85 Briefly, formaldehyde-fixed chromatin was digested with *DpnII*, and 5' overhangs were sealed with biotinylated  
86 nucleotides. Blunt ends were ligated, followed by crosslink were reversed for DNA purification from protein. We  
87 then removed biotin that was not internal to ligated fragments. DNA was sheared to a mean length of ~350 bp for  
88 library construction with NEBNext Ultra enzymes and Illumina-compatible adapters. Biotin-containing fragments  
89 were isolated using streptavidin beads before PCR enrichment of the libraries. Both Chicago and HiC libraries were  
90 sequenced on an Illumina HiSeqX at 2x150bp, attaining totals of 470 million and 500 million reads, respectively.

### 91 **Genome Assembly**

92 An initial genome assembly was generated with Masurca version 3.2.3 (15), attaining a 2,559.8 Mbp genome size  
93 in 29,125 contigs with N50 size of 1,224,689bp. Dovetail Genomics scaffolded this assembly using an iterative  
94 HiRise analysis informed via alignments of Chicago and then HiC libraries with a modified SNAP aligner  
95 (<http://snap.cs.berkeley.edu>). This assembly contained 2,560.5 Mb, with an L90 of 31 scaffolds, and a N90 of  
96 43.374 Mb. 1,004,453,472 Chicago and HI-C reads were used to scaffold this Dovetail assembly with a Juicer 1.5.6,  
97 3D-DNA 180922, and JuiceBox 1.9.8 (16, 17). Reads were extracted from bam files with Picard 2.9.2 (18). The  
98 Dovetail assembly was masked using RepeatModeler 4.0.7 (19) and RepeatMasker 1.0.8 (20), prior to the  
99 alignment of HI-C reads with BWA mem 0.7.17(21). Alignments were processed using Juicer, 3D-DNA(22), and  
100 Juicebox (16, 17). The Juicebox assembly strategy consisted of: manually placing all contigs greater than 10kb,

101 incorporating scaffolds at the highest HI-C signal, placing scaffolds in non-repetitive regions when HI-C signal was  
102 equal between a repetitive and non-repetitive region, repeats were clustered whenever possible, and only obvious  
103 mis-joins were edited. The initial Juicebox scaffolding created 34 pseudomolecules, which was then compared to  
104 the *Cervus elaphus hippelaphus* genome assembly (GCA\_002197005.1)(23) to reveal the merger of the X and Y  
105 chromosomes. A BLASTn (24) of the *C. elaphus hippelaphus* genome sequence was used to identify coordinates,  
106 allowing the correct separation the X and Y chromosome via the heatmap in Juicebox. The 3D-DNA assembly  
107 finished with 22,557 scaffolds.

108 The contigs that could not be integrated into the pseudomolecules were eliminated based on repetitiveness,  
109 duplicated heterozygous contigs, RNA-seq mapping potential, and contig size (>500 bp). BEDTools 2.25.0 (25) was  
110 used to merge coordinates from mapping these contigs to the pseudomolecules with BLAST+ 2.9 (score >300) and  
111 RepeatMasker 1.0.8 (20) masking coordinates. 22,065 contigs were eliminated that were less than 1kb, had at least  
112 90% query coverage, and lacked a single unique mapping RNA-seq read, leaving 35 pseudomolecules, 457 contigs,  
113 and a mitochondrial genome.

114 The assembly was polished with Pilon 1.23 (26) using CCS PacBio reads and paired end Illumina DNA-seq. CCS  
115 PacBio reads were created from the PacBio subreads using bax2bam (27) and Bamtools 2.5.1 (28) and then aligned  
116 using Minimap 2.6 (29). Paired end reads were aligned using Hisat2 2.0.5 (30), followed by bam conversion and  
117 sorting with Samtools 1.9 (31). Due to uneven and excessive coverage in repetitive regions, paired end alignments  
118 were set at a max coverage of 30x using jvarkit (32). Due to the excessive repetitiveness of Chromosome\_14,  
119 50Mbp of this chromosome was not polished.

120 After polishing, another round of small contig elimination was performed by merging RepeatMasker (20)  
121 coordinates and coordinates from BLAST+ 2.9 (24) (score >300, width 1000bp) to the pseudomolecules with  
122 Bedtools 2.25.0 (25). If 90% of query length was repetitive and contained within the pseudomolecules, it was  
123 eliminated. BlobTools 1.11 (33) was run with PacBio subread alignments to the genome, and contigs annotated  
124 with BLAST (24) to the NT database (Supplemental Figure 1). All scaffolds passed contamination screening, resulting  
125 in a final assembly containing 35 pseudomolecules, 151 contigs, and the mitochondria.

## 126 Mitochondrial identification and annotation

127 BLAST+ 2.9 (24) was used to identify the mitochondrial genome by querying the mitochondrial scaffold of the *C.*  
128 *elaphus hippelaphus* GCA\_002197005.1(23). Though the mitochondrial genome was identified, it contained three  
129 juxtaposed mitochondrial genome duplications. The scaffold was manually corrected with Samtools 1.9 (31). Genes  
130 were annotated in the mitochondrial genome using the MitoS2 webserver (34) with RefSeq 89 Metazoa, a genetic  
131 code of 2, and default settings.

## 132 Repeat prediction

133 A final version of predicted repeats was obtained using EDTA 1.7.9 (35) and RepeatModeler 1.0.8 (19) with  
134 RepeatMasker 4.1.0(20).

## 135 Gene prediction

136 A total of 753,228,475 RNA-seq reads aligned to the genome using Hisat2 2.0.5 (30) followed by bam conversion  
137 and sorting with Samtools 1.9 (31). RNA-seq read counts were obtained using Subread 1.5.2 (36). The alignments  
138 were assembled into genome-guided transcriptomes using Trinity 2.8.4 (37-39), Strawberry 1.1.1 (40), Stringtie  
139 1.3.3b (41, 42), and Class2 2.1.7(43). The RNA-seq alignments were also used for a gene prediction via Braker2  
140 2.1.4 (44)with Augustus 3.3.3 (45) on a genome soft-masked by RepeatMasker 1.0.8 (20)with a RepeatModeler  
141 4.0.7 (19) library. High confidence exon splicing junctions were identified using Portcullis 1.1.2 (46). Each of these  
142 assemblies were then supplied to Mikado 2.0rc6 (47) to pick consensus transcripts, while utilizing Cervus-specific  
143 proteins from Uniprot (48) (downloaded 12-28-19). This mikado prediction was filtered for transposable elements  
144 using Bedtools 2.25.0 intersect (25) and filtered for pseudogenes via removing genes with five or fewer mapping  
145 RNA-seq reads. Using Bedtools 2.25.0 (25) intersect these filtered Mikado gene models were used to find  
146 corresponding Braker2 2.1.4 (44) gene models. Both of these predictions, together with a Genomethreader 1.7.1  
147 (49) alignment of Uniprot proteins from the Pecora infraorder (downloaded 02-07-20) were used for a final round  
148 of Mikado gene prediction. The predicted transcripts and proteins were generated using Cufflinks (50) gffread  
149 (2.2.1), and subjected to functional annotation to: Interproscan 5.27-66.0 (51, 52) and BLAST (24) searches to NCBI

150 NT and NR databases downloaded on 10-23-19, as well as Swissprot/Uniprot databases downloaded on  
151 12/09/2019.

## 152 BUSCO

153 Universal single copy orthologs were assessed using BUSCO 4.0 (53, 54), with the eukaryota\_odb10 and  
154 cetartiodactyla\_odb10 datasets in both genome and protein mode.

## 155 Synteny

156 With the predicted proteins from *B. taurus* (GCF\_002263795.1\_ARS-UCD1.2) (55), *C. elaphus* (GCA\_002197005.1)  
157 (23) and *C. canadensis* genome assemblies, we inferred gene orthology using BLASTp (24) at cutoffs of an e-value  
158 of 1e-5, 50% query cover, and 70% identity. Gene-based synteny was predicted using iAdHoRe 3.0.01 [81] with  
159 prob\_cutoff=0.001, level 2 multiplicons only, gap\_size=5, cluster\_gap=15, q\_value=0.01, and a minimum of 3  
160 anchor points. Synteny figures were produced using Circos (0.69.2) [82]. Dot plots were produced using MCSanX  
161 20170403 (56).

## 162 Identification of Immune System-related Genes

163 Immune system-related genes from *Bos taurus* were found in the GENE-DB database of the International  
164 ImMunoGeneTics website ([www.imgt.org](http://www.imgt.org)) (57). This database is comprised of immunoglobulins (IG), T cell  
165 receptors (TR) and major histocompatibility (MH) genes from vertebrate species. A tblastn (2.9.0+) was performed  
166 against the elk and cattle genome assemblies, with an e-value cutoff of 1e-3.

## 167 Results and Discussion

168

169 Here we presented the first pseudomolecule assembly of the *C. canadensis*, generated with 1.7 trillion base pairs  
170 of sequencing at a 686-fold coverage of the genome.

171

## 172 Genome Assembly

173 An initial assembly was created with MaSuRCA (15, 58) generating 23,302 contigs, an L90 of 2,500 contigs, and an  
174 N90 of 197,963bp. Through collaboration with Dovetail Genomics and then additional implementation of the  
175 Juicer/JuiceBox/3D-DNA pipeline(16, 17, 22), we generated an assembly of 33 autosomes, an X chromosome, a Y  
176 chromosome, a mitochondrial genome, and 151 unincorporated contigs. We utilized synteny to identify  
177 homologous chromosomes between elk and red deer, and found that nearly always, elk chromosome sizes fell  
178 within the estimated size of the red deer's assembled chromosomes (23) (Supplemental Table 1). The only  
179 exception is the Y chromosome, which was nearly twice (7.6 Mb) the largest predicted size (4 Mb) of the red deer  
180 chromosome. We investigated all putative contaminant contigs from Blobtools (33), and ruled out contamination  
181 (Supplemental Figure 1), but also took additional steps to ensure the completeness of the genome by mapping  
182 reads back to the assembly. We found that we captured the majority of genome, with 90.7% and 87.3% of PacBio  
183 CCS reads Illumina DNA-seq aligning to the genome (Supplemental Table 2). To evaluate the completeness of the  
184 genome we ran BUSCO 4.0.2 (54) (Benchmarking Universal Single Copy Orthologs) on genome. Of the possible 255  
185 and 13335 genes in the eukaryota and certartiodactyla odb10 datasets, 62% and 88.1% were complete, 2.4% and  
186 2.1% were duplicated, and 3.1% and 2.1% were fragmented, and 32.5% and 9.8% were missing, respectively.

187

## 188 **Genome Annotation**

189 To obtain a high-quality elk gene prediction, we pursued an extensive annotation of repeats in the genome using  
190 two repeat predictors. While EDTA (35) utilizes a comprehensive set of repeat prediction programs to create a  
191 repeat annotation, Repeatmodeler/Repeatmasker (19, 20) is a long-standing and comparable annotator of repeats  
192 that is more reliant on copy number. With EDTA, 25.8% of the genome was marked repetitive, with DNA  
193 transposons comprised the largest percentage of repeats in the genome, at 16% (Supplemental Table 3). In  
194 contrast, RepeatMasker assessed 36.5% of the genome as an interspersed repeat, with 28.8% of the genome being  
195 comprised LINE retrotransposons. We merged these repeat annotations with BEDTools (25) to reveal that 38% of  
196 the genome is repetitive. This is in contrast to the repetitive content in red deer, estimated at 22.7%. This  
197 difference could be due to technological improvements and could stem from the large proportion of gaps in the



198 red deer genome (1.5Gbp) (23). While together these differences could account for a large disparity in  
199 chromosome sizes, only the elk Y chromosome was outside the gapped and sequence length range in red deer  
200 chromosomes (23).

201 To annotate the genes in the genome we generated 1.5 billion paired end reads of sequencing from six tissues,  
202 including kidney, lung, mesenteric lymph node, muscle, prescapular lymph node, and spleen. After masking repeat  
203 sequences using Repeatmodeler (19) and Repeatmaker (20), we performed five de novo transcript/gene  
204 predictions with a soft-masked genome and RNA-seq. The best transcripts were discerned using Mikado(47),  
205 followed by clustering with Cufflinks (50) using *B. taurus* mRNAs to cluster transcripts into gene loci. Using this  
206 approach 18,013 genes were predicted to encode 33,433 mRNAs (Supplemental Table 4). The functional  
207 annotations of these genes were extremely high, with 17,938 of the 18,013 genes or 99.6% being annotated by at  
208 least one of: Interproscan or BLAST to NR, NT, and Uniprot (Supplemental Table 5). The gene annotation was  
209 evaluated for completeness with BUSCO in protein mode. A remarkable “Complete” score improvement is seen in  
210 both eukaryota and cetartiodactyla at 97.7% and 92.1%, respectively. These results together suggest that both the  
211 genome and the gene prediction are of high quality.

## 212 Comparison to Related Species

213 By utilizing these new gene predictions we evaluated the conservation of chromosome structure between *C.*  
214 *canadensis*, *C. elaphus hippelaphus*, and *B. taurus* using gene-based synteny with i-ADHoRe (59). All elk  
215 chromosomes were syntenic with all *C. elaphus* and *B. taurus* chromosomes, though chromosome Y lacked the  
216 genes required for gene-based synteny (Figure 1, Table 1). As has been seen in previous Cervus assemblies (23),  
217 multiple pairs of chromosomes are tandemly fused in *B. taurus* and vice-versa (Table 2). We confirmed previous  
218 reports of chromosome fusions and fissions indicated that twelve cervus chromosomes fused into six in *B. taurus*,  
219 as well as four chromosomes in *B. taurus* are fused into two cervus chromosomes (Table 2).

220 Two inter-chromosomal translocations were inferred between the two Cervus species, both having strong HiC  
221 support in Elk (Figure 1, Table 3). Chromosome\_15 and Chromosome\_24 of elk, comprised large portions of  
222 Ce\_Chr\_33 and a minor portion of *C. elaphus* Ce\_Chr\_8. With the majority of Chromosome\_24 homologous to *C.*

223 *elaphus hippelaphus* Ce\_Chr\_8, a 17 MB region of Ce\_Chr\_33 may have been falsely attached to Ce\_Chr\_8 in *C.*  
224 *elaphus hippelaphus*. Another smaller chromosome translocation of 13.6 MB occurred between Ce\_Chr\_22 and  
225 Ce\_Chr\_3 of *C. elaphus*, attributed to chromosomes 21 and 25 in *C. canadensis*. A small region of Ce\_Chr\_22 was  
226 likely falsely attached to Ce\_Chr\_3 in *C. elaphus hippelaphus*. Interestingly, both of these translocations are  
227 between chromosomes in elk that are fused chromosomes in *B. taurus*, Bt\_Chr\_2 and Bt\_Chr\_5 (table). While it is  
228 possible that these translocations occurred since the divergence of these two species, because the *B. taurus*  
229 assembly was used to orient and join scaffolds in the *C. elaphus hippelaphus* genome assembly, it is likely that  
230 these translocations are misassemblies in the *C. elaphus hippelaphus* genome.

## 231 Immune Gene Loss

232 Nine *Bos taurus* immune genes were identified from the IMGT GENE-DB database (57) that did not align to the Elk  
233 genome: AY644518\_TRGJ1, KT723008\_IGHJ2, AC172685\_IGHA, IMGT000049\_TRDC, D16120\_TRGJ2,  
234 AY149283\_IGHJ1, AY2277782\_TRAJ31, AY644517\_TRG and NW\_001494075\_IGHJ1. These genes are all  
235 components of the T cell receptor: (gamma joining 1), (gamma joining 2), (alpha joining 31), and (delta constant) or  
236 of the Immunoglobulin complex: (heavy joining 1), (heavy joining 2) and (heavy constant alpha). Interestingly,  
237 seven of the nine genes are located at the very end of chromosomes 01 and 02 in *Bos taurus* (Table 4). *B. taurus*  
238 chromosomes 01 and 02 have split in *C. canadensis* into chromosomes 7 and 27, and chromosomes 24 and 15,  
239 respectively (Table 2) suggesting a possible mechanism for loss of these genes through large chromosomal  
240 rearrangements and fission. Future work will be required to investigate how the loss of these genes affects cellular  
241 immune response in elk, yet this may provide the foundation necessary to develop long-term immunity to Brucella.

## 242 Conclusions

243

244 This genome assembly and annotation of the Rocky Mountain elk is the most contiguous assembly of a Cervus  
245 species and will serve as an important tool for genomic exploration of all related Cervids. Elk's loss of immune  
246 system-related genes in relation to cattle, may provide a clue to establishing a successful vaccination strategy. This

247 chromosomal assembly of the elk genome will provide an excellent resource for investigating genes involved in  
248 elk's poor adaptive cellular immune response to *Brucella* vaccines.

249

## 250 Acknowledgements

251 The authors would like to thank Maryam Sayadi for fruitful discussion regarding the genome assembly paper, and  
252 Mary Wood regarding elk sample collection.

## 253 Author contributions

254 Conceptualization –SO; data curation – REM, AS; formal analysis – REM, AZ, AS; funding acquisition – SO;  
255 investigations – DA, DOB, PB, WE, FT, JWM, JWW; methodology – REM, AZ, AS; resources -- AS, software – REM,  
256 AZ, AS; supervision -- SO, validation – REM, AS; visualization -- REM, writing -- REM, AS; review and editing – REM,  
257 DA,WE, AS, SO

258 **Data Availability:** The Rocky Mountain elk genome has been deposited at GenBank accession and associated  
259 sequencing reads to the NCBI SRA database under BioProject PRJNA657053. All programs and scripts are available  
260 at [https://github.com/ISUgenomics/elk\\_genomics](https://github.com/ISUgenomics/elk_genomics).

261 **Funding:** This work was supported by the USDA National Institute of Food and Agriculture under grant 2018-  
262 67015-28199 to AZ.

263 **Competing interests:** The authors have declared that no competing interests exist.

264

- 265 1. Stelfox J. Elk in north-west Alberta. *Land-Forest-Wildlife*. 1964;6(5):14-23.
- 266 2. Pybus MJ, Butterworth EW, Woods JG. An expanding population of the giant liver fluke  
267 (*Fascioloides magna*) in elk (*Cervus canadensis*) and other ungulates in Canada. *Journal of Wildlife*  
268 *Diseases*. 2015;51(2):431-45.
- 269 3. Green H. The elk of Banff National Park. Unpubl. 1946:32.
- 270 4. Lloyd H. Transfers f elk for re-stocking. *Can Field Nat*. 1927;41:126-7.
- 271 5. Lothian W. A history of Canada's National Parks. 1981;4:155.

- 272 6. Flook DR. A Study of the Apparent Unequal Sex Ration of Wapiti: University of Alberta (Ph. D.);  
273 1967.
- 274 7. Stewart KM, Bowyer RT, Kie JG, Cimon NJ, Johnson BK. Temporospacial Distributions of Elk, Mule  
275 Deer, and Cattle: Resource Partitioning and Competitive Displacement. *Journal of Mammalogy*.  
276 2002;83(1):229-44.
- 277 8. Cotterill GG, Cross PC, Merkle JA, Rogerson JD, Scurlock BM, Du Toit JT. Parsing the effects of  
278 demography, climate and management on recurrent brucellosis outbreaks in elk. *Journal of Applied*  
279 *Ecology*. 2020;57(2):379-89.
- 280 9. Godfroid J. Brucellosis in wildlife. *Revue Scientifique et Technique-Office international des*  
281 *épizooties*. 2002;21(1):277-86.
- 282 10. Lowry J, Goodridge L, Vernati G, Fluegel A, Edwards W, Andrews G. Identification of *Brucella*  
283 *abortus* genes in elk (*Cervus elaphus*) using in vivo-induced antigen technology (IVIAT) reveals novel  
284 markers of infection. *Veterinary microbiology*. 2010;142(3-4):367-72.
- 285 11. Yingst S, Hoover D. T cell immunity to brucellosis. *Critical reviews in microbiology*.  
286 2003;29(4):313-31.
- 287 12. Nol P, Olsen SC, Rhyan JC, Sriranganathan N, McCollum MP, Hennager SG, et al. Vaccination of  
288 elk (*Cervus canadensis*) with *Brucella abortus* strain RB51 overexpressing superoxide dismutase and  
289 glycosyltransferase genes does not induce adequate protection against experimental *Brucella abortus*  
290 challenge. *Frontiers in cellular and infection microbiology*. 2016;6:10.
- 291 13. Putnam NH, O'Connell BL, Stites JC, Rice BJ, Blanchette M, Calef R, et al. Chromosome-scale  
292 shotgun assembly using an in vitro method for long-range linkage. *Genome research*. 2016;26(3):342-50.
- 293 14. Lieberman-Aiden E, Van Berkum NL, Williams L, Imakaev M, Ragozcy T, Telling A, et al.  
294 Comprehensive mapping of long-range interactions reveals folding principles of the human genome.  
295 *science*. 2009;326(5950):289-93.
- 296 15. Zimin AV, Marçais G, Puiu D, Roberts M, Salzberg SL, Yorke JA. The MaSuRCA genome assembler.  
297 *Bioinformatics*. 2013;29(21):2669-77.
- 298 16. Dudchenko O, Shamim MS, Batra SS, Durand NC, Musial NT, Mostofa R, et al. The Juicebox  
299 Assembly Tools module facilitates de novo assembly of mammalian genomes with chromosome-length  
300 scaffolds for under \$1000. *Biorxiv*. 2018:254797.
- 301 17. Durand NC, Robinson JT, Shamim MS, Machol I, Mesirov JP, Lander ES, et al. Juicebox provides a  
302 visualization system for Hi-C contact maps with unlimited zoom. *Cell systems*. 2016;3(1):99-101.
- 303 18. Intitute B. Picard Tools. 2019.
- 304 19. Smit A, Hubley R, Green P. RepeatModeler Open-1.0. 2008-2010. Access date Dec. 2014.
- 305 20. Smit A, Hubley R, Green P. RepeatMasker Open-4.0. 2013–2015. Institute for Systems Biology  
306 <http://repeatmasker.org>. 2015.
- 307 21. Li H, Durbin R. Fast and accurate short read alignment with Burrows–Wheeler transform.  
308 *Bioinformatics*. 2009;25(14):1754-60.
- 309 22. Dudchenko O, Batra SS, Omer AD, Nyquist SK, Hoeger M, Durand NC, et al. De novo assembly of  
310 the *Aedes aegypti* genome using Hi-C yields chromosome-length scaffolds. *Science*. 2017;356(6333):92-  
311 5.
- 312 23. Bana NÁ, Nyiri A, Nagy J, Frank K, Nagy T, Stéger V, et al. The red deer *Cervus elaphus* genome  
313 *CerEla1.0*: sequencing, annotating, genes, and chromosomes. *Molecular Genetics and Genomics*.  
314 2018;293(3):665-84.
- 315 24. Madden T. The BLAST sequence analysis tool. *The NCBI Handbook [Internet] 2nd edition*:  
316 National Center for Biotechnology Information (US); 2013.
- 317 25. Quinlan AR. BEDTools: the Swiss-army tool for genome feature analysis. *Current protocols in*  
318 *bioinformatics*. 2014;11.2. 1-2. 34.

- 319 26. Walker BJ, Abeel T, Shea T, Priest M, Abouelliel A, Sakthikumar S, et al. Pilon: an integrated tool  
320 for comprehensive microbial variant detection and genome assembly improvement. *PLoS one*.  
321 2014;9(11):e112963.
- 322 27. Biosciences P. SMRT Link. 2017.
- 323 28. Barnett D, Garrison E, Marth G, Stromberg M. BamTools. 2013.
- 324 29. Li H. Minimap and miniasm: fast mapping and de novo assembly for noisy long sequences.  
325 *Bioinformatics*. 2016;32(14):2103-10.
- 326 30. Kim D, Langmead B, Salzberg S. HISAT2: graph-based alignment of next-generation sequencing  
327 reads to a population of genomes. 2017.
- 328 31. Li H, Handsaker B, Wysoker A, Fennell T, Ruan J, Homer N, et al. The sequence alignment/map  
329 format and SAMtools. *Bioinformatics*. 2009;25(16):2078-9.
- 330 32. Lindenbaum P. JVarkit: java-based utilities for Bioinformatics. 2015. Preprint Available: figshare.  
331 2018.
- 332 33. Laetsch DR, Blaxter ML. BlobTools: Interrogation of genome assemblies. *F1000Research*.  
333 2017;6(1287):1287.
- 334 34. Donath A, Jühling F, Al-Arab M, Bernhart SH, Reinhardt F, Stadler PF, et al. Improved annotation  
335 of protein-coding genes boundaries in metazoan mitochondrial genomes. *Nucleic acids research*.  
336 2019;47(20):10543-52.
- 337 35. Ou S, Su W, Liao Y, Chougule K, Agda JR, Hellinga AJ, et al. Benchmarking transposable element  
338 annotation methods for creation of a streamlined, comprehensive pipeline. *Genome biology*.  
339 2019;20(1):1-18.
- 340 36. Liao Y, Smyth GK, Shi W. The Subread aligner: fast, accurate and scalable read mapping by seed-  
341 and-vote. *Nucleic acids research*. 2013;41(10):e108-e.
- 342 37. Grabherr MG, Haas BJ, Yassour M, Levin JZ, Thompson DA, Amit I, et al. Full-length  
343 transcriptome assembly from RNA-Seq data without a reference genome. *Nature biotechnology*.  
344 2011;29(7):644-52.
- 345 38. Haas BJ, Papanicolaou A, Yassour M, Grabherr M, Blood PD, Bowden J, et al. De novo transcript  
346 sequence reconstruction from RNA-seq using the Trinity platform for reference generation and analysis.  
347 *Nature protocols*. 2013;8(8):1494-512.
- 348 39. Henschel R, Lieber M, Wu L-S, Nista PM, Haas BJ, LeDuc RD, editors. Trinity RNA-Seq assembler  
349 performance optimization. *Proceedings of the 1st Conference of the Extreme Science and Engineering  
350 Discovery Environment: Bridging from the eXtreme to the campus and beyond*; 2012.
- 351 40. Liu R, Dickerson J. Strawberry: Fast and accurate genome-guided transcript reconstruction and  
352 quantification from RNA-Seq. *PLOS Computational Biology*. 2017;13(11):e1005851.
- 353 41. Pertea M, Pertea GM, Antonescu CM, Chang T-C, Mendell JT, Salzberg SL. StringTie enables  
354 improved reconstruction of a transcriptome from RNA-seq reads. *Nature biotechnology*. 2015;33(3):290.
- 355 42. Pertea M, Kim D, Pertea GM, Leek JT, Salzberg SL. Transcript-level expression analysis of RNA-  
356 seq experiments with HISAT, StringTie and Ballgown. *Nature protocols*. 2016;11(9):1650.
- 357 43. Song L, Sabunciyar S, Florea L. CLASS2: accurate and efficient splice variant annotation from  
358 RNA-seq reads. *Nucleic acids research*. 2016;44(10):e98-e.
- 359 44. Hoff KJ, Lomsadze A, Stanke M, Borodovsky M. BRAKER2: incorporating protein homology  
360 information into gene prediction with GeneMark-EP and AUGUSTUS. *Plant and Animal Genomes XXVI*.  
361 2018.
- 362 45. Stanke M, Diekhans M, Baertsch R, Haussler D. Using native and syntenically mapped cDNA  
363 alignments to improve de novo gene finding. *Bioinformatics*. 2008;24(5):637-44.
- 364 46. Mapleson D, Venturini L, Kaithakottil G, Swarbreck D. Efficient and accurate detection of splice  
365 junctions from RNA-seq with Portcullis. *GigaScience*. 2018;7(12):giy131.

- 366 47. Venturini L, Caim S, Kaithakottil GG, Mapleson DL, Swarbreck D. Leveraging multiple  
367 transcriptome assembly methods for improved gene structure annotation. *GigaScience*.  
368 2018;7(8):giy093.
- 369 48. Consortium U. UniProt: a worldwide hub of protein knowledge. *Nucleic acids research*.  
370 2019;47(D1):D506-D15.
- 371 49. Gremme G. GenomeThreader Gene Prediction Software. 2014.
- 372 50. Trapnell C, Roberts A, Goff L, Pertea G, Kim D, Kelley DR, et al. Differential gene and transcript  
373 expression analysis of RNA-seq experiments with TopHat and Cufflinks. *Nature protocols*. 2012;7(3):562.
- 374 51. Finn RD, Attwood TK, Babbitt PC, Bateman A, Bork P, Bridge AJ, et al. InterPro in 2017—beyond  
375 protein family and domain annotations. *Nucleic acids research*. 2016;45(D1):D190-D9.
- 376 52. Jones P, Binns D, Chang H-Y, Fraser M, Li W, McAnulla C, et al. InterProScan 5: genome-scale  
377 protein function classification. *Bioinformatics*. 2014;30(9):1236-40.
- 378 53. Simão FA, Waterhouse RM, Ioannidis P, Kriventseva EV, Zdobnov EM. BUSCO: assessing genome  
379 assembly and annotation completeness with single-copy orthologs. *Bioinformatics*. 2015:btv351.
- 380 54. Waterhouse RM, Seppey M, Simão FA, Manni M, Ioannidis P, Klioutchnikov G, et al. BUSCO  
381 applications from quality assessments to gene prediction and phylogenomics. *Molecular biology and  
382 evolution*. 2017;35(3):543-8.
- 383 55. Rosen BD, Bickhart DM, Schnabel RD, Koren S, Elsik CG, Tseng E, et al. De novo assembly of the  
384 cattle reference genome with single-molecule sequencing. *GigaScience*. 2020;9(3).
- 385 56. Wang Y, Tang H, DeBarry JD, Tan X, Li J, Wang X, et al. MCSanX: a toolkit for detection and  
386 evolutionary analysis of gene synteny and collinearity. *Nucleic Acids Research*. 2012;40(7):e49-e.
- 387 57. Giudicelli V, Chaume D, Lefranc M-P. IMGT/GENE-DB: a comprehensive database for human and  
388 mouse immunoglobulin and T cell receptor genes. *Nucleic acids research*. 2005;33(suppl\_1):D256-D61.
- 389 58. Zimin AV, Puiu D, Luo M-C, Zhu T, Koren S, Marçais G, et al. Hybrid assembly of the large and  
390 highly repetitive genome of *Aegilops tauschii*, a progenitor of bread wheat, with the MaSuRCA mega-  
391 reads algorithm. *Genome research*. 2017;27(5):787-92.
- 392 59. Proost S, Fostier J, De Witte D, Dhoedt B, Demeester P, Van de Peer Y, et al. i-ADHoRe 3.0—fast  
393 and sensitive detection of genomic homology in extremely large data sets. *Nucleic acids research*.  
394 2011;40(2):e11-e.

395

396

397 Figure 1. Synteny and HiC plot of Elk chromosomes. A. Gene-based synteny between *C. elaphus hippelaphus* and  
398 *C. canadensis*. B. HiC plot of elk chromosomes in JuiceBox. C. Gene-based synteny between *B. taurus* and *C.*  
399 *canadensis*.



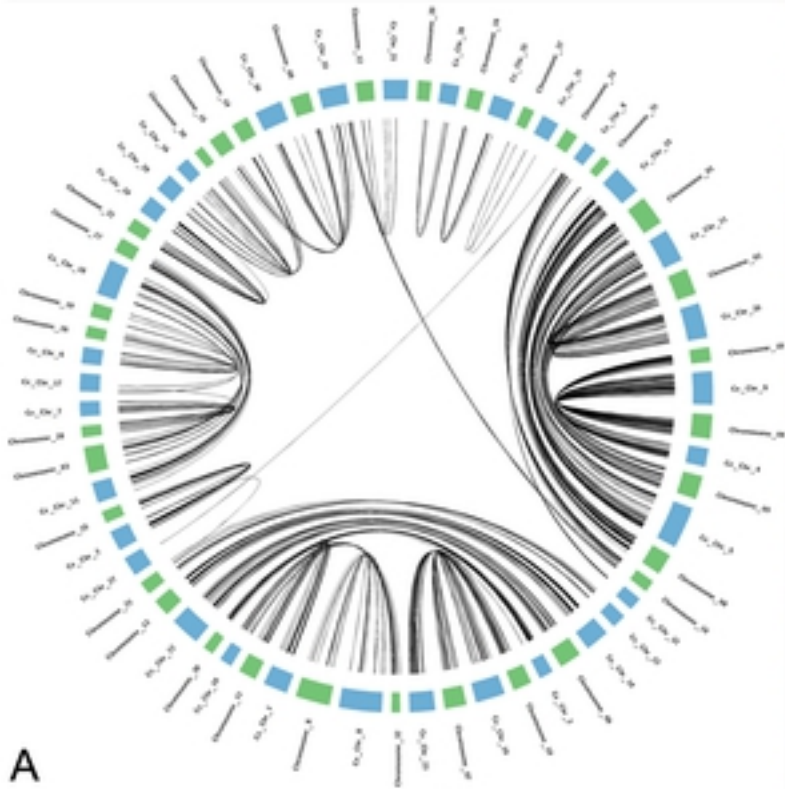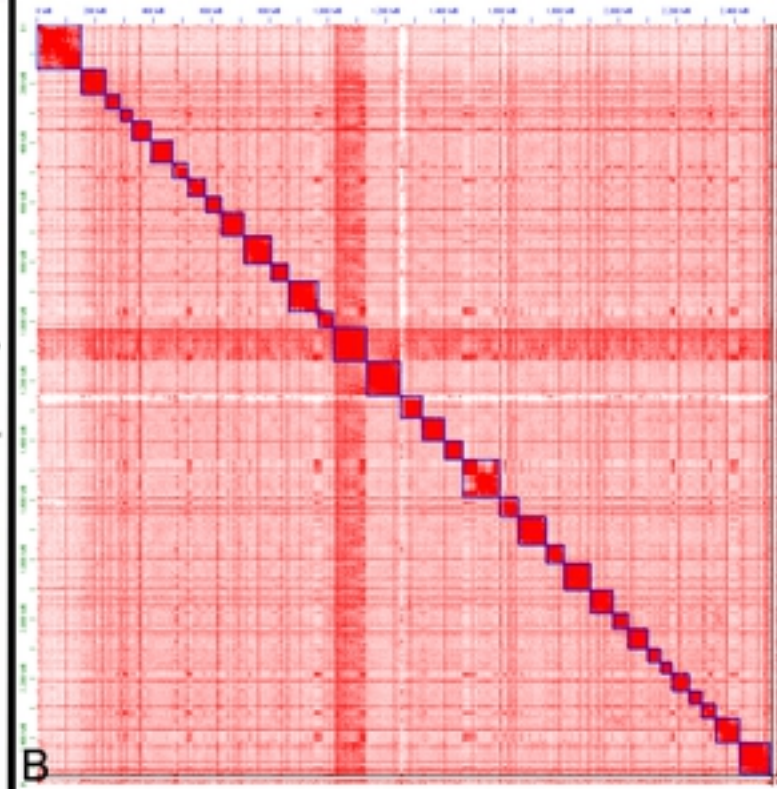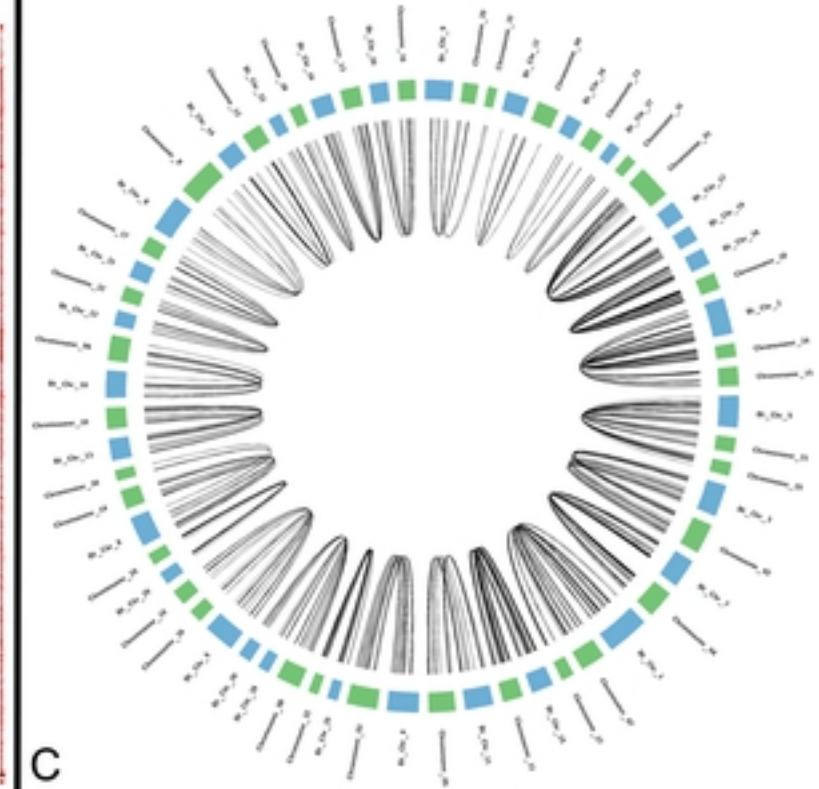

Figure 1
